# Supplementary material for: Vulcan: Improved long-read mapping and structural variant calling via dual-mode alignment
Source: PubMed Central journal article supplement (PMC8463296; doi:10.1093/gigascience/giab063), 2021-09-24
Supplement: giab063_response_to_reviewer_comments_revision_2.pdf [file giab063_response_to_reviewer_comments_revision_2.pdf]

# Author's Response To Reviewer Comments

Close

all minor revisions fixed/address, and word doc uploaded

Close
