# Supplementary material for: Vulcan: Improved long-read mapping and structural variant calling via dual-mode alignment
Source: PubMed Central journal article supplement (PMC8463296; doi:10.1093/gigascience/giab063), 2021-09-24
Supplement: giab063_supplemental_file.pdf [file giab063_supplemental_file.pdf]

# Supplementary Info

**Supplementary Table 1: Programs, program versions, and parameters used in this study.**

| Program  | Version    | Usage                          | Parameters                                                                                                                                                           |
|----------|------------|--------------------------------|----------------------------------------------------------------------------------------------------------------------------------------------------------------------|
| Vulcan   | 1.0.2      | read mapping                   | vulcan [] -t threads                                                                                                                                                 |
| minimap2 | 2.17-r941  | simulated ONT read mapping     | minimap2 --MD -x map-ont -a                                                                                                                                          |
| minimap2 | 2.17-r941  | Human ONT read mapping         | minimap2 --MD -x map-ont -a -z 600,200                                                                                                                               |
| minimap2 | 2.17-r941  | Human PacBio HiFi read mapping | minimap2 --MD -a -k 19 -O 5,56 -E 4,1 -B 5 -z 400,50 -r 2k -eqx --secondary=no                                                                                       |
| minimap2 | 2.17-r941  | Human Pacbio CLR read mapping  | minimap2 --MD -x map-pb -a -eqx -L -O 5,56 -E 4,1 -B 5 --secondary=no -z 400,50 -r 2k -Y                                                                             |
| NGMLR    | 0.2.7      | read mapping                   | NGMLR -x [ont   pacbio] -bam-fix                                                                                                                                     |
| Sniffles | 1.0.12     | SV calling                     | sniffles -s 2                                                                                                                                                        |
| bcftools | 1.7        | VCF filtering                  | bcftools view -i (INFO/SVLEN>=50 INFO/SVLEN<=-50 INFO/SVLEN=0 INFO/SVLEN=1)&(INFO/RE={read_num})                                                                     |
| Truvari  | v2.0.0-dev | SV benchmarking                | truvari bench -b {GIAB_vcf} -c {sorted_gzipped_vcf} -f {reference_genome} -passonly-giabreport -pctsim=0 -multimatch -includebed {GIAB_bed} -o {benchmarking_output} |
| SURVIVOR | 1.0.7      | SV simulation                  | SURVIVOR simSV {reference_genome} {parameter_file} 0.01 0 {output_prefix}                                                                                            |

**Supplementary Table 2: Accuracy, Precision and F1 score of simulated data.**

| <b>Nanopore Simulated 10X</b> | <b>Recall</b> | <b>Precision</b> | <b>F1</b>     |
|-------------------------------|---------------|------------------|---------------|
| minimap2                      | 81%           | 62%              | 70.24%        |
| NGMLR                         | 92%           | 62%              | 74.24%        |
| Vulcan 80%                    | <b>95%</b>    | <b>74%</b>       | <b>83.13%</b> |

### Supplementary Figure 1: Wall time benchmarking of Vulcan, NGMLR and minimap2 on Nanopore 10X datasets

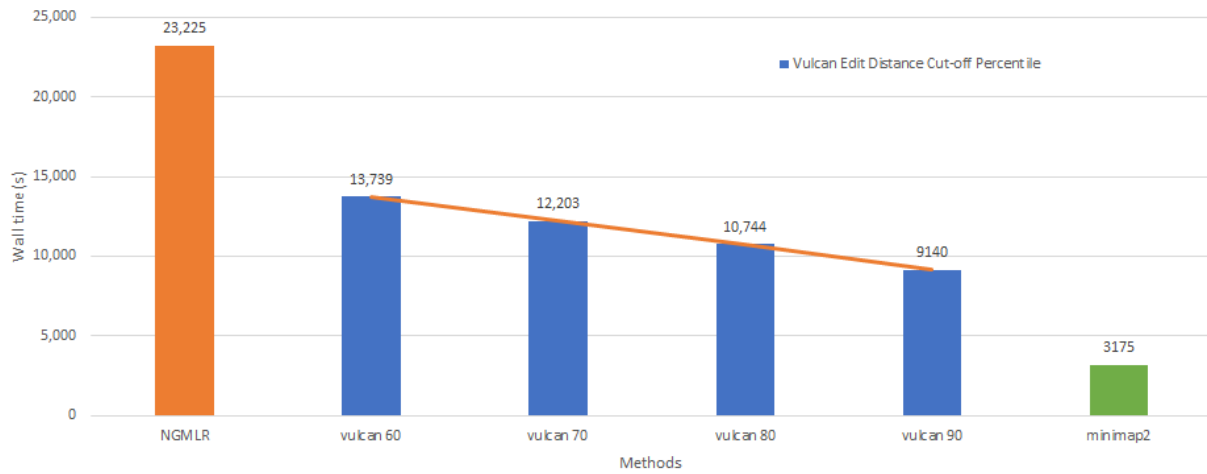

A wall time benchmarking has been performed to compare the performance of three different methods. From the chart we can infer that Vulcan takes less than 2/5 time than NGMLR. The experiment was performed on a Nanopore 10X submaple real dataset from the GIAB project.

**Supplementary Figure 2: CPU time benchmarking of Vulcan, NGMLR and minimap2 on PacBio 20X datasets**

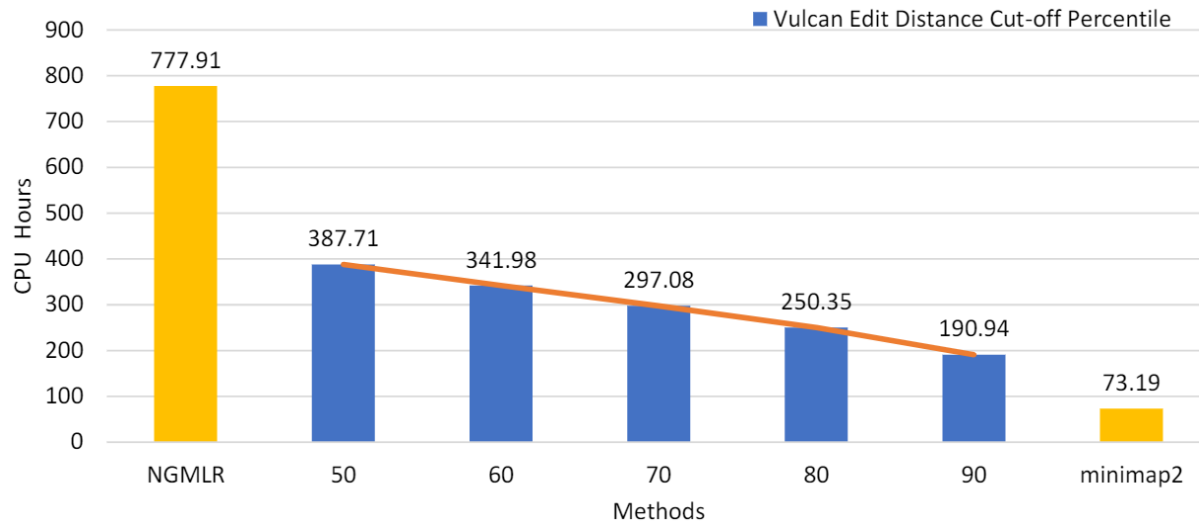

Vulcan achieves an approximately linear acceleration with the increase of the cut-off percentile. With a 90% percentile cut-off, Vulcan only takes about 1/4 of NGMLR's runtime. The experiment was performed on a PacBio CLR 20X subsampled real dataset from the GIAB project.
